# Supplementary material for: Microbial co-occurrence complicates associations of gut microbiome with US immigration, dietary intake and obesity
Source: PubMed Central journal article supplement (PMC8665519; doi:10.1186/s13059-021-02559-w), 2021-12-10
Supplement: 13059_2021_2559_MOESM1_ESM.pdf [file 13059_2021_2559_MOESM1_ESM.pdf]

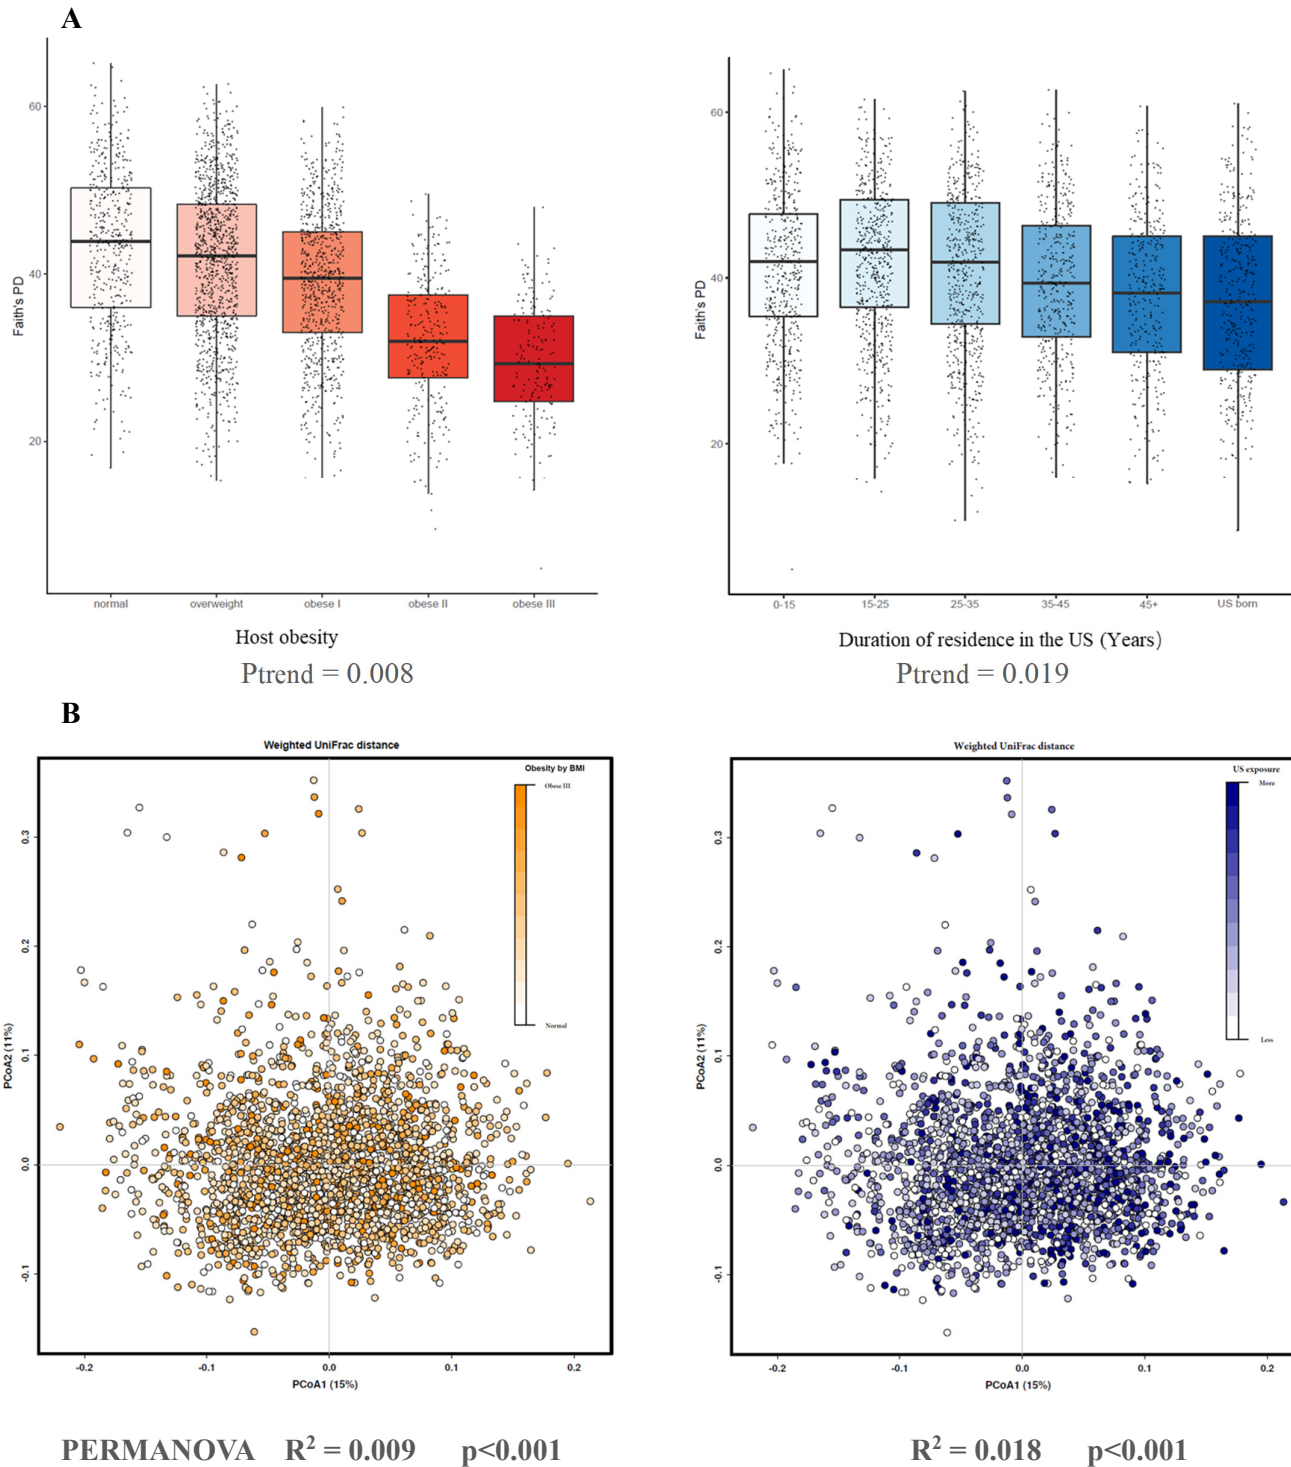

**Figure S1. Microbial community diversity associated with obesity and US exposure. A. Associations of shotgun metagenomics alpha diversity Faith's phylogenetic distance (PD) with obesity and US exposure.** These associations were estimated after adjustment for demographic, socioeconomic, behavioral and clinical factors. **B. Beta diversity Principal coordinate analysis based on weighted UniFrac distances.** Both of the host obesity and US exposure significantly co-varied with the diversity of the gut microbiome ( $P < 0.001$ ) and explained moderate proportion of variance. The adonis function from the vegan package was used to assess statistical significance for PERMANOVA.

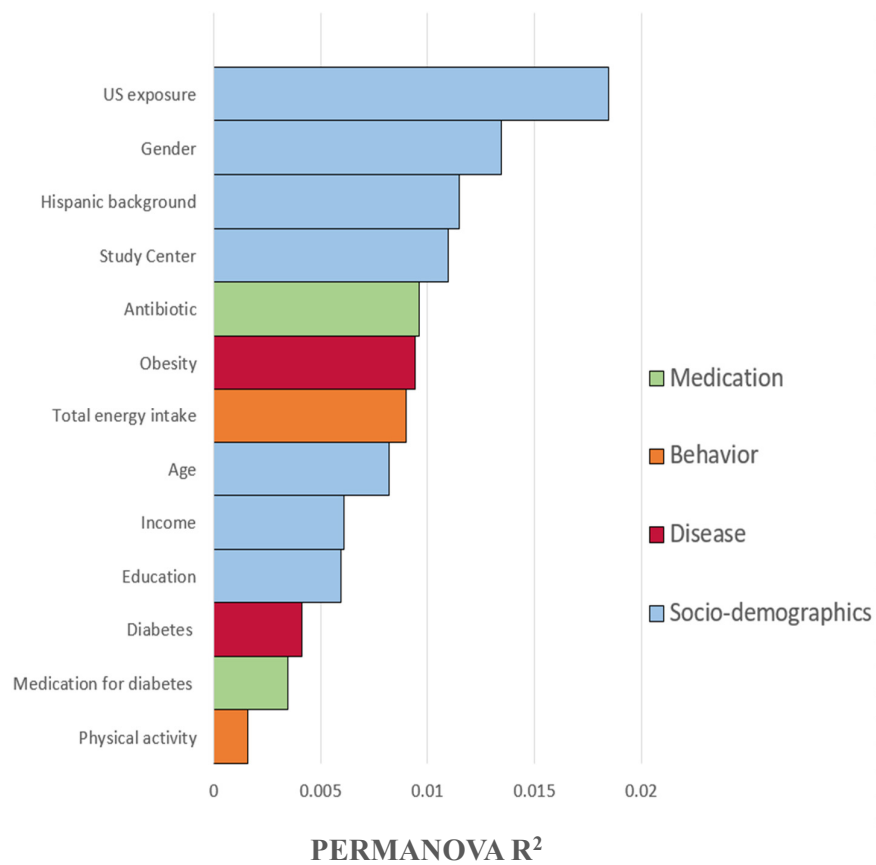

**Figure S2. Beta diversity PERMANOVA analysis for obesity, US exposure, and other co-variables, ranked by R<sup>2</sup>.** Calculated using the adonis function of the vegan package. All P < 0.05 except Physical activity.

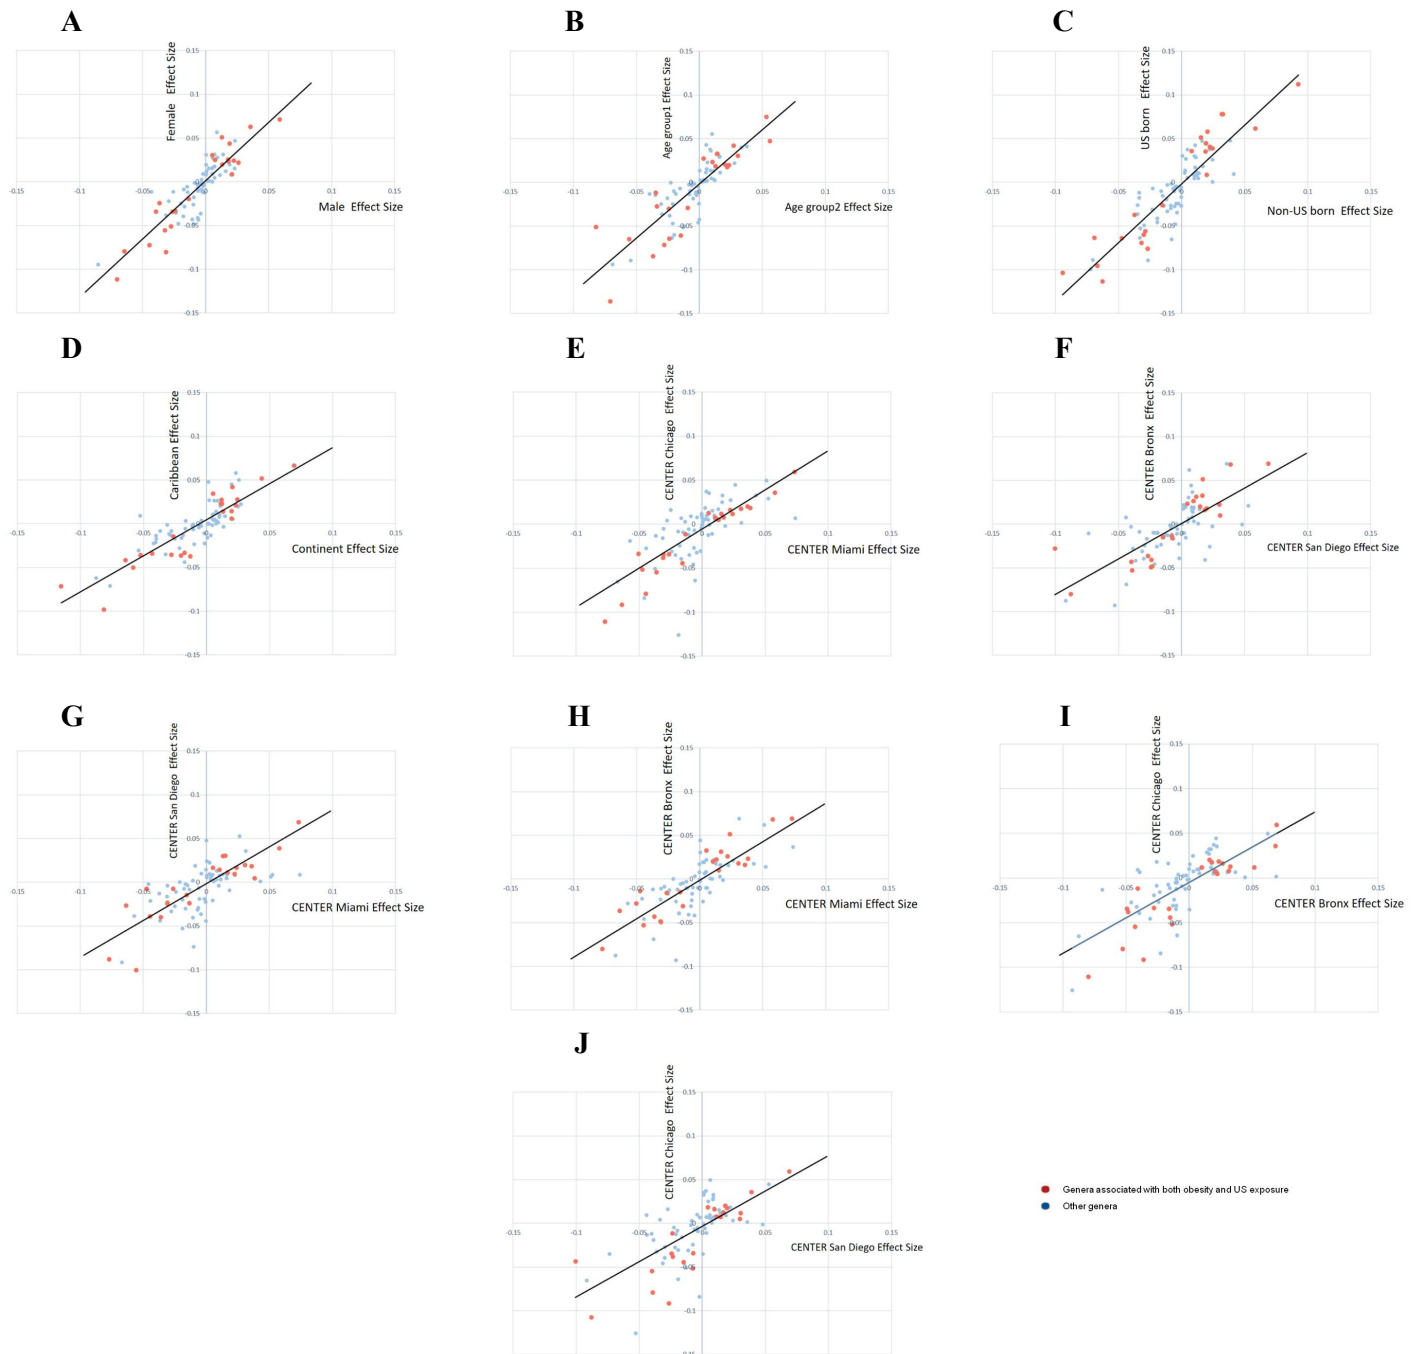

**Figure S3. Associations of gut microbiota and host obesity (BMI), stratified by: A. Sex; B. Age group (< 55 and  $\geq$  55 years); C. Place of birth (US born and non-US born); D. Hispanic origin (Caribbean [Dominican, Cuban, Puerto Rican] and Mainland [Central American, Mexican, South American]); E to J. Field Center (Bronx, Chicago, Miami, San Diego). Each node represents one genus. All the predominant genera with average relative abundance  $>0.01\%$  were included in this analysis. The 23 bacterial genera associated with both obesity and US exposure were highlighted by red, and no significant differences in associations between these 23 bacterial genera with BMI across strata were observed (all P for interaction  $>0/05$ ). Models were adjusted for demographic, socioeconomic, behavioral and clinical factors.**

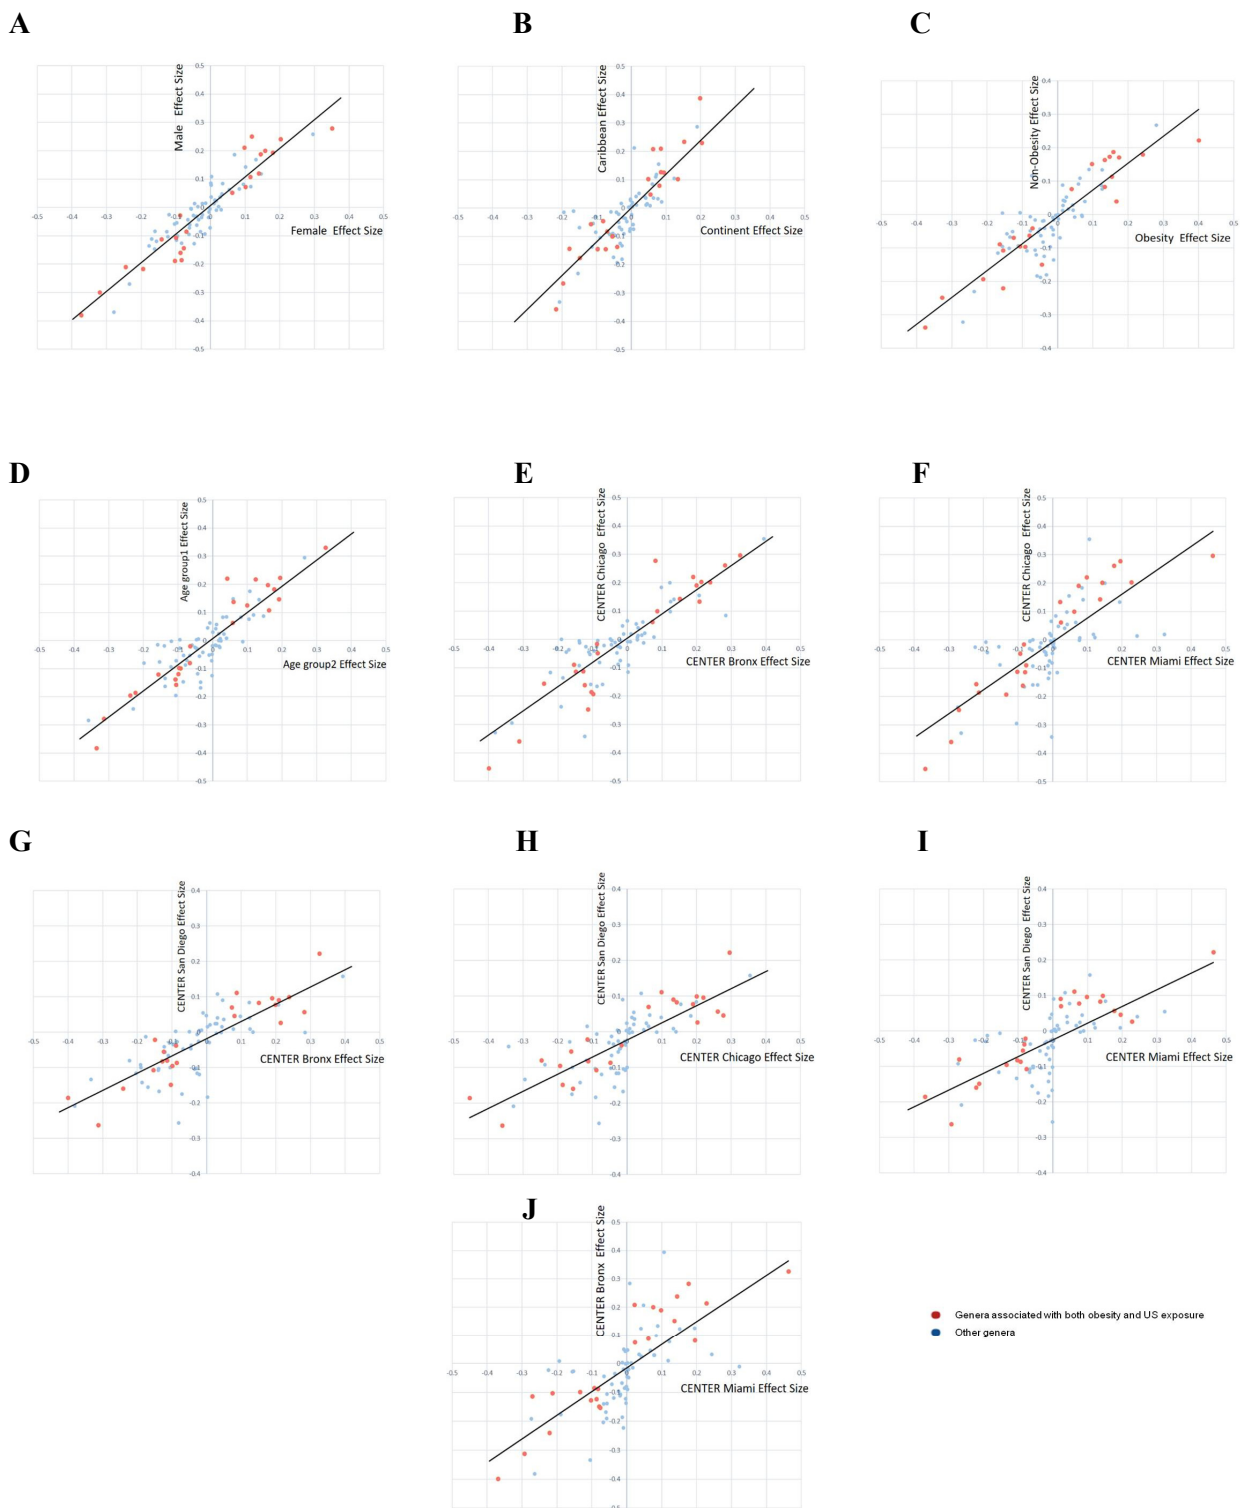

**Figure S4.** Associations of gut microbiota and US exposure, further stratified by : A. Sex; B. Hispanic origin (Caribbean [Dominican, Cuban, Puerto Rican] and Mainland [Central American, Mexican, South American]); C. Obesity; D. Age group (< 55 and  $\geq$  55 years); E to J. Field Center (Bronx, Chicago, Miami, San Diego). Each node represents one genus. All the predominant genera with average relative abundance >0.01% were included in this analysis. The 23 bacterial genera associated with both obesity and US exposure were highlighted by red. Models were adjusted for demographic and behavioral covariates.

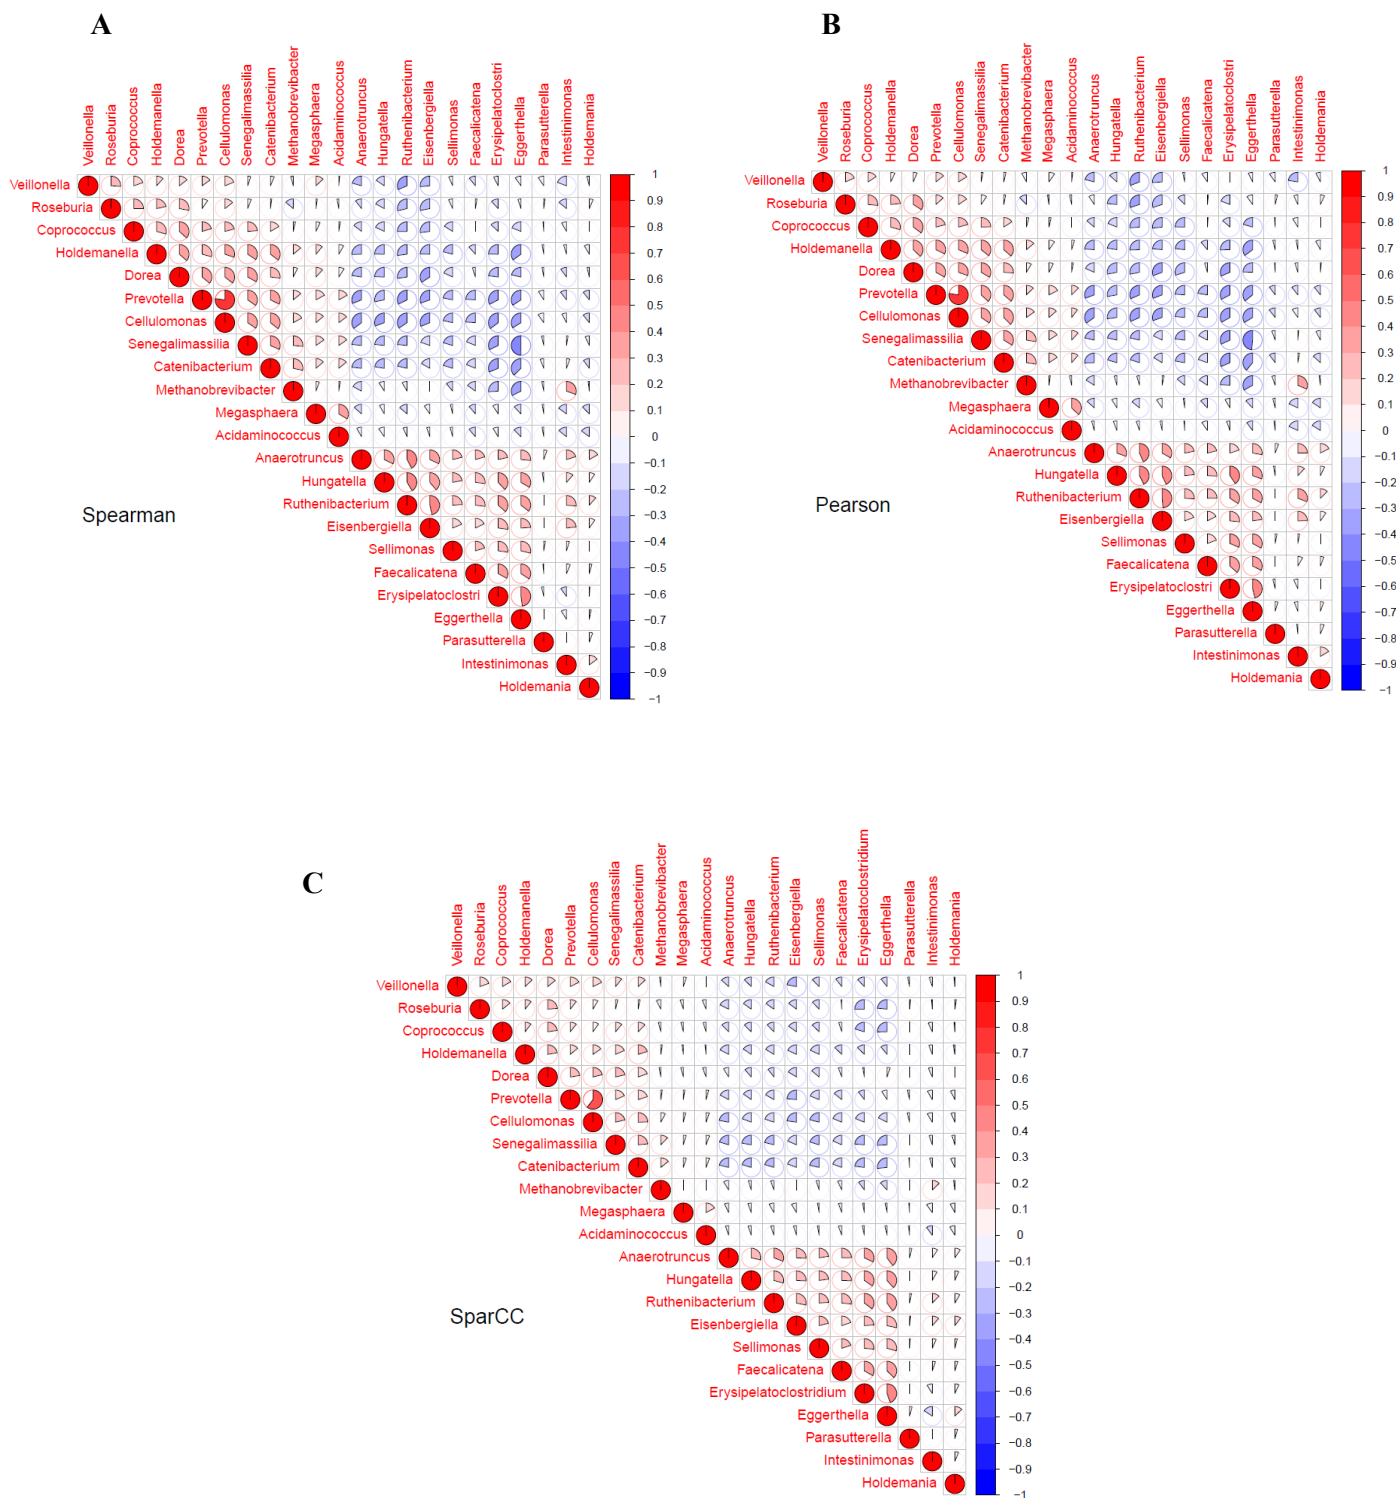

**Figure S5. Correlation heatmap for the 23 identified bacterial genera associated with both obesity and US exposure. A. Spearman correlation. B. Pearson correlation. C. SparCC correlation**

**D.**

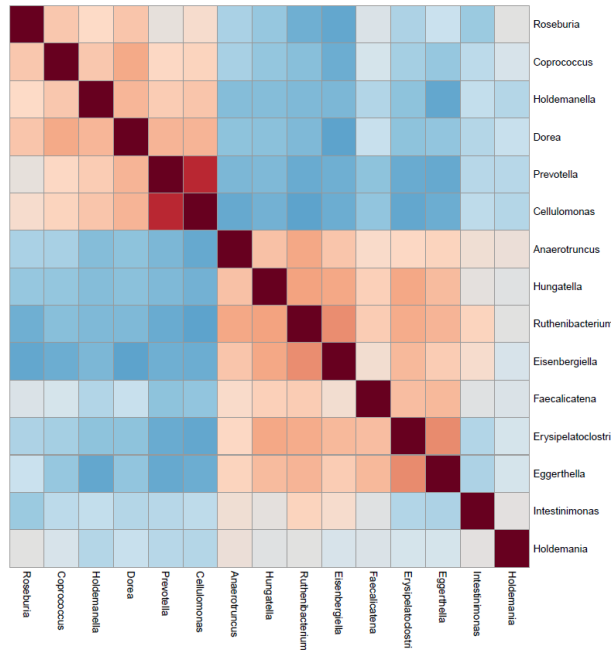

**E.**

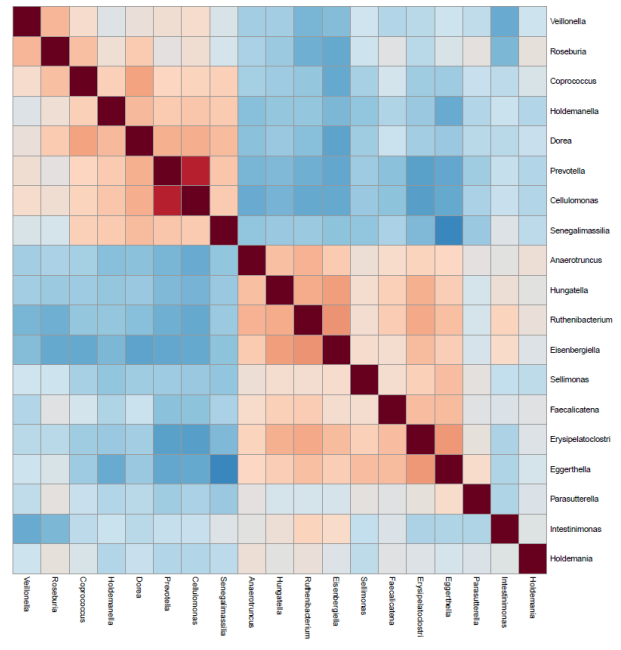

**F.**

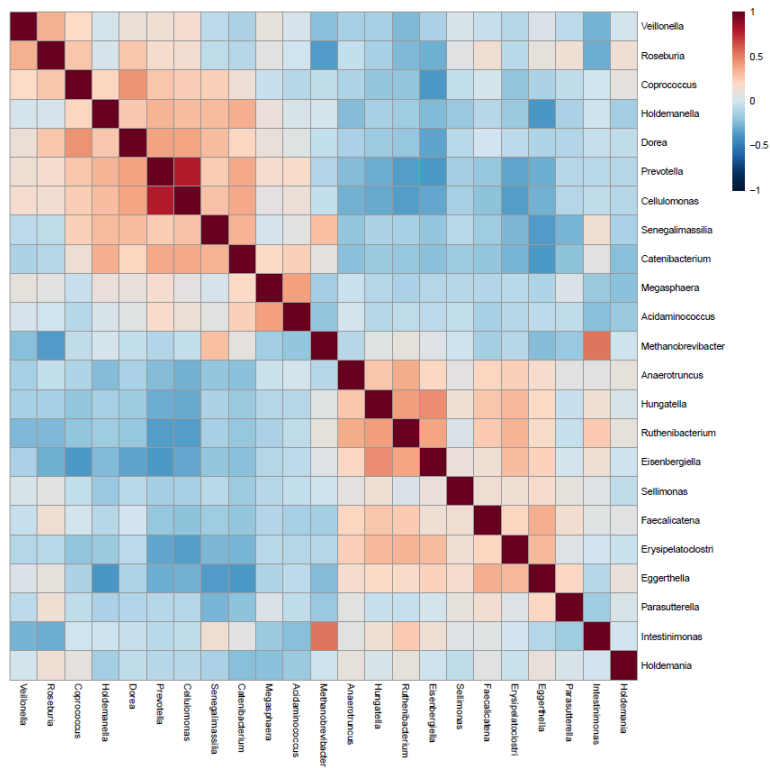

**Figure S5. Correlation heatmap for the 23 identified bacterial genera associated with both obesity and US exposure.**

**D. Sensitivity Analysis** included the samples harboring all of the 15 most prevalent genera (n=2220). The prevalence of the 15 key genera  $\geq 90\%$  in the whole study population.

**E. Sensitivity Analysis** included the samples harboring all of the 19 most prevalent key genera (n=1016). The prevalence of the 19 key genera  $\geq 80\%$  in the whole study population.

**F. Sensitivity Analysis** included the samples harboring all of the 23 genera (n= 323).

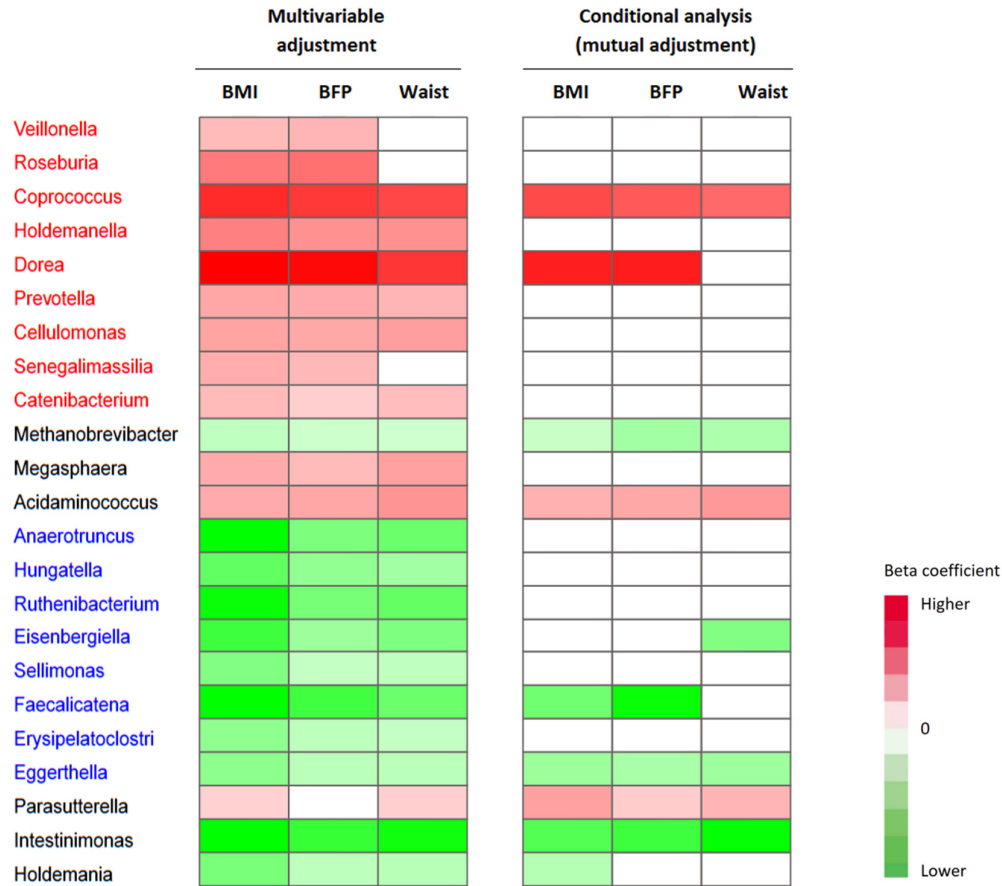

**Figure S6. Associations of 23 gut microbial genera with BMI, Body fat percentage and waist circumference.** These associations were estimated after adjustment for demographic, socioeconomic, behavioral and clinical factors (multivariable adjustment) and further adjustment for other bacterial genera (conditional analysis, mutual adjustment). Red/green colors depict significant positive/inverse associations and the gradient colors reflect the rank of effect sizes estimated in linear regression models, while white color indicates non-significant associations.

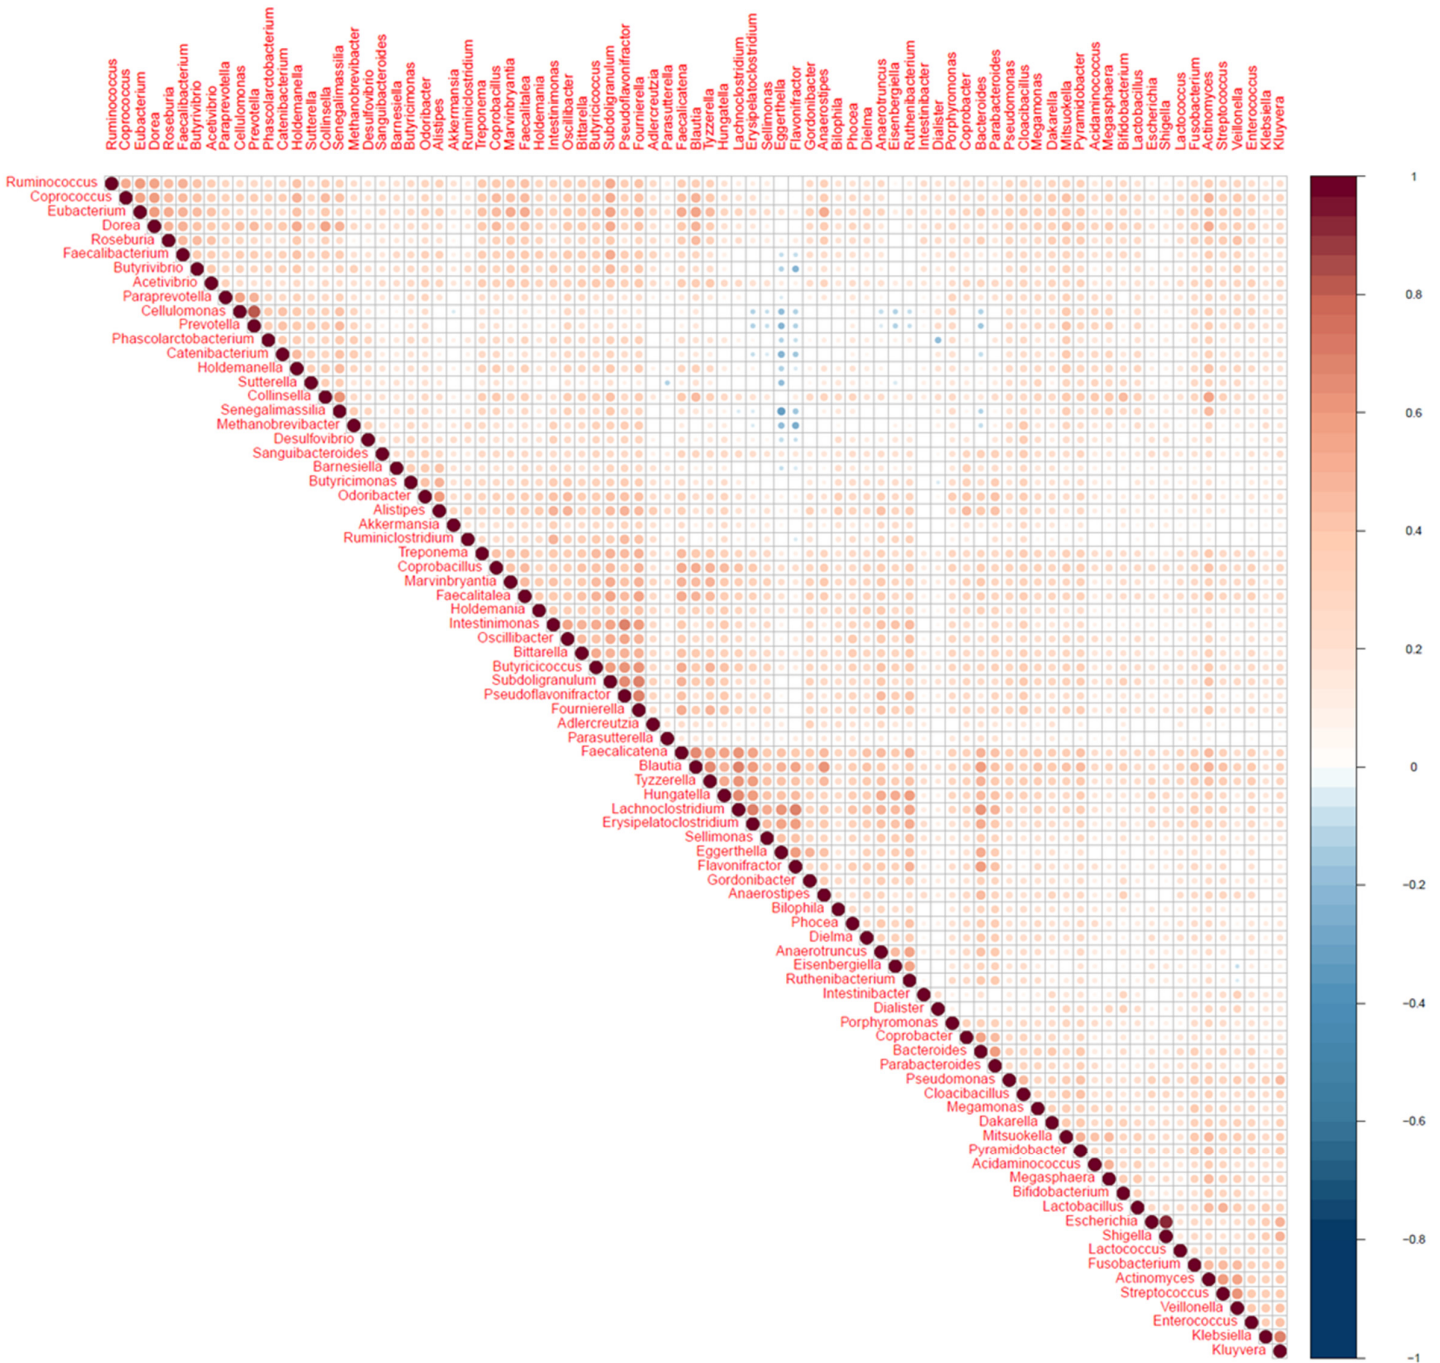

**Figure S7. Correlation heatmap for all bacterial genera, using log ratios data and *Clostridium* as reference.** The reference genus *Clostridium* was selected based on differential ranking analysis using songbird pipeline, since it was stable (with minimum absolute ranks) across experimental conditions (BMI) and present across most samples. The natural Log-ratio of microbial genera data was calculated using *Clostridium* as the reference. Significant Spearman correlations ( $p < 0.01$ ) were shown.



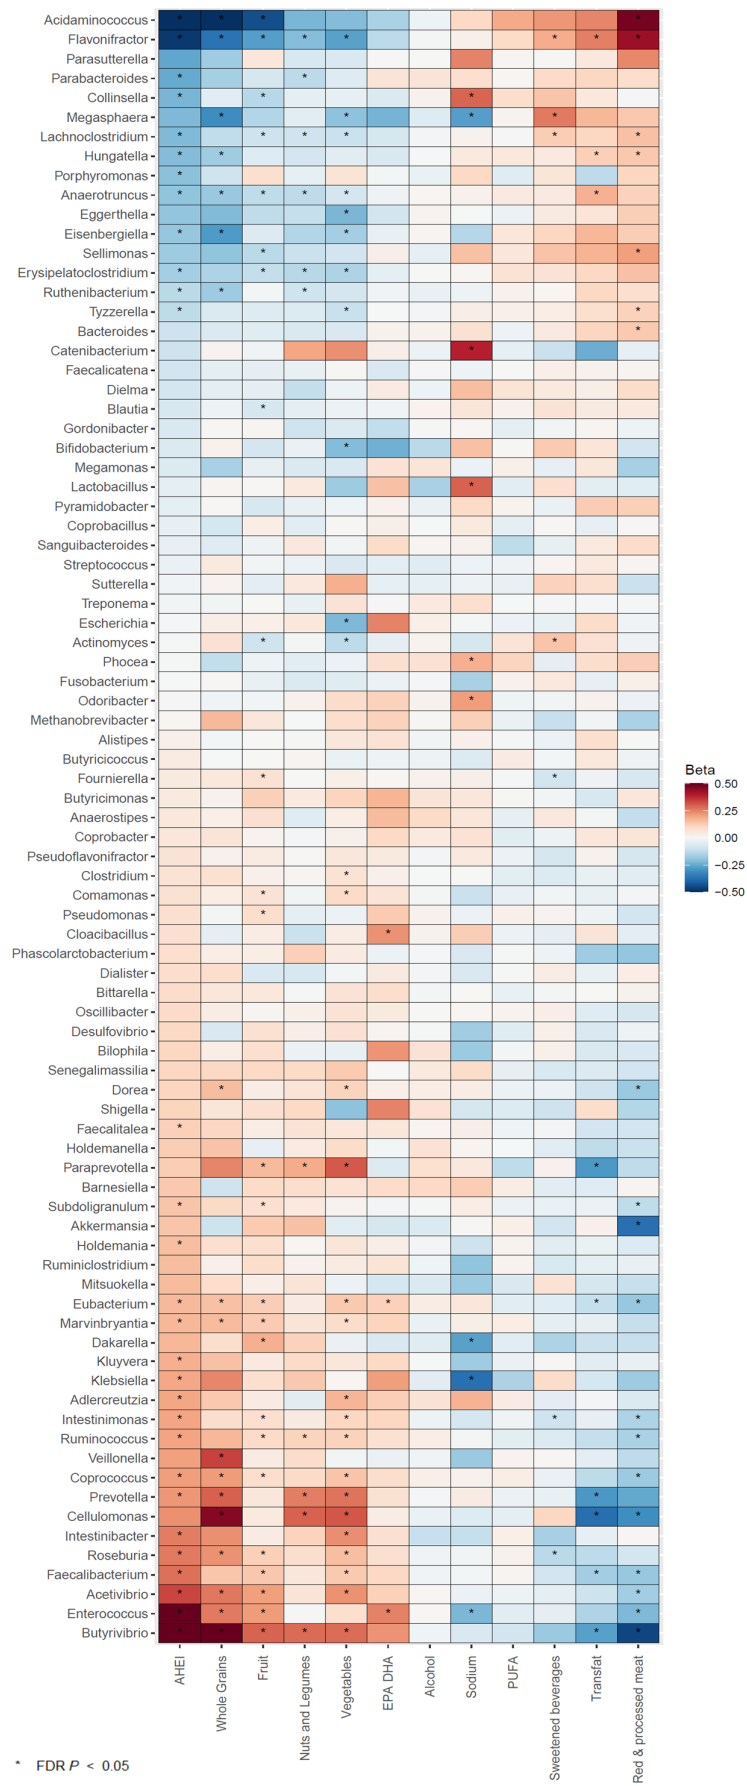

**Figure S8. Heatmap for overall dietary quality and individual dietary factor associated with gut microbial genera.** Data are effect sizes of dietary factors on gut microbial genera after adjustment for demographic, socioeconomic, behavioral and clinical factors.

**Table S1. Characteristics of the study population by US exposure**

|                                    | Duration of residence in the US (Years) |             |             |             |             | Mainland<br>US born |
|------------------------------------|-----------------------------------------|-------------|-------------|-------------|-------------|---------------------|
|                                    | 0-15                                    | 15-25       | 25-35       | 35-45       | 45+         |                     |
| No. of participants                | 455                                     | 546         | 548         | 413         | 310         | 368                 |
| Age, year                          | 55.4 (11.2)                             | 55.3 (10.6) | 57.5 (8.3)  | 60.7 (7.5)  | 65.7 (7.3)  | 49 (13.2)           |
| Sex, % female                      | 68 %                                    | 65%         | 63%         | 67%         | 64%         | 58%                 |
| Hispanic background, %             |                                         |             |             |             |             |                     |
| Dominican                          | 16%                                     | 13%         | 12%         | 8%          | 6%          | 4%                  |
| Central American                   | 8%                                      | 12%         | 16%         | 9%          | 3%          | 1%                  |
| Cuban                              | 35%                                     | 17%         | 6%          | 9%          | 6%          | 7%                  |
| Mexican                            | 30%                                     | 45%         | 47%         | 53%         | 30%         | 40%                 |
| Puerto Rican                       | 3%                                      | 3%          | 11%         | 17%         | 51%         | 45%                 |
| South American                     | 9%                                      | 10%         | 6%          | 4%          | 4%          | 2%                  |
| Field Center, %                    |                                         |             |             |             |             |                     |
| Bronx                              | 18%                                     | 21%         | 24%         | 20%         | 42%         | 37%                 |
| Chicago                            | 15%                                     | 30%         | 30%         | 37%         | 26%         | 25%                 |
| Miami                              | 44%                                     | 26%         | 16%         | 9%          | 7%          | 6%                  |
| San Diego                          | 20%                                     | 21%         | 28%         | 32%         | 24%         | 30%                 |
| Less than high school Education, % | 26%                                     | 38%         | 43%         | 50%         | 43%         | 18%                 |
| Annually family income, \$         |                                         |             |             |             |             |                     |
| <20,000                            | 47%                                     | 45%         | 40%         | 46%         | 52%         | 34%                 |
| 20,000-40,000                      | 37%                                     | 35%         | 35%         | 32%         | 27%         | 25%                 |
| >40,000                            | 16%                                     | 20%         | 25%         | 22%         | 21%         | 41%                 |
| Physical activity, MET-min/day     | 21.4 (29.6)                             | 22.3 (28.3) | 26.9 (45.4) | 19.8 (24.1) | 21.5 (29.1) | 28.9 (36.8)         |
| AHEI score                         | 51.5 (6.8)                              | 52.2 (7.2)  | 52.6 (7.4)  | 49.1 (7.3)  | 49.9 (8.2)  | 46.2 (7.6)          |
| BMI, kg/m <sup>2</sup>             | 29.6 (5.0)                              | 29.7 (5.1)  | 30 (5.6)    | 30.2 (5.7)  | 30.4 (5.7)  | 31.1 (7.5)          |
| Waist circumference, cm            | 98.1(11.7)                              | 99.1(12.5)  | 100.0(12.7) | 100.3(13.3) | 101.5(12.9) | 102.6(17.4)         |
| Body fat percentage                | 35.9(8.8)                               | 36.1(8.6)   | 36.2(8.5)   | 36.6(8.5)   | 36.1(8.2)   | 36.3(10.7)          |
| Host obesity status, %             |                                         |             |             |             |             |                     |
| Normal                             | 16%                                     | 17%         | 15%         | 14%         | 16%         | 19%                 |
| Overweight                         | 42%                                     | 40%         | 39%         | 42%         | 38%         | 31%                 |
| Obese I                            | 30%                                     | 30%         | 27%         | 27%         | 28%         | 23%                 |
| Obese II                           | 9%                                      | 9%          | 12%         | 9%          | 11%         | 14%                 |
| Obese III                          | 3%                                      | 4%          | 6%          | 7%          | 6%          | 11%                 |
| Metformin use, %                   | 10%                                     | 15%         | 19%         | 21%         | 21%         | 11%                 |

**Table S3. Multivariable regression analyses: 23 genera associated with both obesity and US exposure.**

| Taxa_Genus             | Association with Obesity |          |          | Association with US exposure |          |          | Direction of association |             | Expected | Cluster  | Association with Fiber |          |          |
|------------------------|--------------------------|----------|----------|------------------------------|----------|----------|--------------------------|-------------|----------|----------|------------------------|----------|----------|
|                        | Beta                     | P        | P.FDR    | Beta                         | P        | P.FDR    | Obesity                  | US exposure |          |          | Beta                   | P        | P.FDR    |
| Acidaminococcus        | 0.024                    | 3.31E-07 | 4.63E-06 | 0.321                        | 3.38E-11 | 2.18E-10 | Pos                      | Pos         | Y        | -        | -0.416                 | 2.55E-05 | 4.28E-04 |
| Megasphaera            | 0.024                    | 1.12E-04 | 5.85E-04 | 0.090                        | 1.36E-02 | 2.48E-02 | Pos                      | Pos         | Y        | -        | -0.274                 | 2.24E-04 | 1.78E-03 |
| Parasutterella         | 0.013                    | 7.91E-03 | 2.01E-02 | 0.148                        | 1.54E-03 | 3.09E-03 | Pos                      | Pos         | Y        | -        | -0.029                 | 7.63E-01 | 8.67E-01 |
| Methanobrevibacter     | -0.017                   | 2.46E-03 | 7.66E-03 | -0.132                       | 9.24E-04 | 1.99E-03 | Neg                      | Neg         | Y        | -        | 0.048                  | 5.51E-01 | 7.12E-01 |
| Holdemania             | -0.036                   | 3.21E-04 | 1.35E-03 | -0.052                       | 2.30E-02 | 4.11E-02 | Neg                      | Neg         | Y        | -        | 0.094                  | 1.48E-02 | 4.35E-02 |
| Intestinimonas         | -0.099                   | 3.99E-14 | 3.35E-12 | -0.076                       | 1.33E-05 | 3.60E-05 | Neg                      | Neg         | Y        | -        | 0.087                  | 1.40E-02 | 4.35E-02 |
| Dorea                  | 0.068                    | 2.54E-08 | 5.61E-07 | -0.101                       | 7.62E-08 | 3.20E-07 | Pos                      | Neg         | N        | ClusterA | 0.093                  | 1.45E-02 | 4.35E-02 |
| Holdemanella           | 0.036                    | 5.20E-05 | 3.12E-04 | -0.110                       | 1.68E-05 | 4.41E-05 | Pos                      | Neg         | N        | ClusterA | -0.047                 | 3.67E-01 | 5.05E-01 |
| Roseburia              | 0.035                    | 1.65E-03 | 5.34E-03 | -0.131                       | 1.15E-10 | 6.89E-10 | Pos                      | Neg         | N        | ClusterA | 0.167                  | 5.53E-05 | 6.63E-04 |
| Coprococcus            | 0.053                    | 2.88E-06 | 3.22E-05 | -0.099                       | 6.10E-07 | 2.09E-06 | Pos                      | Neg         | N        | ClusterA | 0.108                  | 7.54E-03 | 2.88E-02 |
| Prevotella             | 0.021                    | 1.24E-04 | 6.11E-04 | -0.309                       | 2.84E-14 | 2.65E-13 | Pos                      | Neg         | N        | ClusterA | 0.208                  | 1.25E-02 | 4.02E-02 |
| Catenibacterium        | 0.018                    | 1.44E-04 | 6.73E-04 | -0.226                       | 3.65E-06 | 1.14E-05 | Pos                      | Neg         | N        | ClusterA | 0.045                  | 6.51E-01 | 7.81E-01 |
| Cellulomonas           | 0.022                    | 1.99E-04 | 8.81E-04 | -0.374                       | 2.37E-23 | 1.94E-21 | Pos                      | Neg         | N        | ClusterA | 0.284                  | 2.33E-04 | 1.78E-03 |
| Senegalimassilia       | 0.022                    | 3.47E-03 | 1.04E-02 | -0.201                       | 2.11E-11 | 1.48E-10 | Pos                      | Neg         | N        | ClusterA | 0.095                  | 1.20E-01 | 2.41E-01 |
| Veillonella            | 0.018                    | 1.52E-02 | 3.44E-02 | -0.120                       | 1.38E-04 | 3.30E-04 | Pos                      | Neg         | N        | ClusterA | 0.121                  | 6.10E-02 | 1.35E-01 |
| Anaerotruncus          | -0.062                   | 3.95E-06 | 3.69E-05 | 0.162                        | 4.53E-22 | 1.27E-20 | Neg                      | Pos         | N        | ClusterB | -0.128                 | 1.99E-04 | 1.78E-03 |
| Eggerthella            | -0.030                   | 3.05E-05 | 2.33E-04 | 0.166                        | 2.25E-07 | 8.22E-07 | Neg                      | Pos         | N        | ClusterB | -0.128                 | 4.97E-02 | 1.15E-01 |
| Faecalicatena          | -0.075                   | 4.32E-05 | 2.98E-04 | 0.058                        | 2.59E-06 | 8.37E-06 | Neg                      | Pos         | N        | ClusterB | -0.039                 | 1.19E-01 | 2.41E-01 |
| Sellimonas             | -0.032                   | 6.66E-05 | 3.73E-04 | 0.174                        | 1.15E-09 | 6.44E-09 | Neg                      | Pos         | N        | ClusterB | -0.146                 | 1.24E-02 | 4.02E-02 |
| Hungatella             | -0.044                   | 4.62E-04 | 1.85E-03 | 0.130                        | 8.91E-13 | 6.81E-12 | Neg                      | Pos         | N        | ClusterB | -0.107                 | 4.12E-03 | 1.82E-02 |
| Erysipelatoclostridium | -0.030                   | 3.76E-03 | 1.09E-02 | 0.180                        | 4.48E-16 | 7.53E-15 | Neg                      | Pos         | N        | ClusterB | -0.104                 | 2.19E-02 | 6.35E-02 |
| Ruthenibacterium       | -0.062                   | 1.71E-07 | 2.87E-06 | 0.111                        | 4.68E-09 | 2.31E-08 | Neg                      | Pos         | N        | ClusterB | -0.122                 | 1.59E-03 | 8.90E-03 |
| Eisenbergiella         | -0.048                   | 1.41E-09 | 5.92E-08 | 0.216                        | 5.55E-14 | 4.66E-13 | Neg                      | Pos         | N        | ClusterB | -0.211                 | 3.12E-04 | 2.02E-03 |

These associations were estimated after adjustment for demographic, socioeconomic, behavioral and clinical factors.

**Table S10. Association of host obesity and US exposure with gut microbiota: species level analyses.**

| Taxa_Species                                         | Association with Obesity |          |          | Association with US exposure |          |          | Average Relative Abundance (%) |
|------------------------------------------------------|--------------------------|----------|----------|------------------------------|----------|----------|--------------------------------|
|                                                      | Beta                     | P        | P.FDR    | Beta                         | P        | P.FDR    |                                |
| Acidaminococcus_Acidaminococcus_intestini            | 0.132                    | 9.65E-07 | 7.19E-05 | 0.322                        | 1.20E-09 | 1.32E-08 | 0.35                           |
| Acidaminococcus_Acidaminococcus_fermentans           | 0.114                    | 4.55E-02 | 1.81E-01 | -0.047                       | 6.28E-02 | 1.25E-01 | 0.02                           |
| Anaerotruncus_Anaerotruncus_colihominis              | -0.346                   | 1.10E-06 | 7.28E-05 | 0.162                        | 5.44E-16 | 1.62E-14 | 0.12                           |
| Anaerotruncus_Anaerotruncus_sp._G32012               | -0.315                   | 1.02E-04 | 2.43E-03 | -0.030                       | 9.17E-02 | 1.69E-01 | 0.01                           |
| Catenibacterium_Catenibacterium_mitsuokai            | 0.081                    | 2.48E-03 | 2.74E-02 | -0.235                       | 9.99E-06 | 5.13E-05 | 0.32                           |
| Cellulomonas_Cellulomonas_carbonis                   | 0.096                    | 5.57E-03 | 4.85E-02 | -0.413                       | 7.73E-24 | 2.88E-21 | 0.25                           |
| Cellulomonas_Cellulomonas_flavigena                  | 0.235                    | 3.38E-02 | 1.54E-01 | -0.004                       | 7.59E-01 | 8.45E-01 | 0.00                           |
| Coprococcus_Coprococcus_comes                        | 0.181                    | 4.40E-03 | 4.10E-02 | -0.114                       | 4.71E-07 | 3.19E-06 | 0.54                           |
| Coprococcus_Coprococcus_eutactus                     | 0.050                    | 2.38E-01 | 4.67E-01 | -0.326                       | 1.13E-22 | 1.68E-20 | 0.38                           |
| Coprococcus_Coprococcus_sp._HPP0048                  | 0.060                    | 2.09E-01 | 4.39E-01 | 0.170                        | 1.27E-08 | 1.15E-07 | 0.06                           |
| Dorea_Dorea_formicigenans                            | 0.138                    | 4.05E-02 | 1.74E-01 | -0.157                       | 9.55E-14 | 2.03E-12 | 0.42                           |
| Dorea_Dorea_longicatena                              | 0.265                    | 5.15E-07 | 4.38E-05 | -0.160                       | 2.77E-09 | 2.75E-08 | 0.65                           |
| Dorea_Dorea_sp._52                                   | -0.147                   | 9.08E-02 | 2.68E-01 | 0.005                        | 7.63E-01 | 8.45E-01 | 0.01                           |
| Eggerthella_Eggerthella_lenta                        | -0.186                   | 8.39E-06 | 3.57E-04 | 0.161                        | 2.33E-06 | 1.34E-05 | 0.09                           |
| Eggerthella_Eggerthella_sp._YY7918                   | -0.348                   | 1.16E-04 | 2.56E-03 | 0.000                        | 9.98E-01 | 9.98E-01 | 0.00                           |
| Eisenbergiella_Eisenbergiella_tayi                   | -0.288                   | 1.24E-10 | 7.39E-08 | 0.182                        | 1.01E-08 | 9.55E-08 | 0.11                           |
| Erysipelatoclostridium_Clostridium_innocuum          | -0.196                   | 3.24E-03 | 3.27E-02 | 0.114                        | 9.67E-08 | 7.58E-07 | 0.08                           |
| Erysipelatoclostridium_Clostridium_saccharogumia     | -0.081                   | 2.21E-01 | 4.50E-01 | 0.036                        | 9.53E-02 | 1.74E-01 | 0.01                           |
| Erysipelatoclostridium_Clostridium_spiroforme        | -0.095                   | 2.92E-02 | 1.38E-01 | 0.204                        | 5.99E-10 | 7.14E-09 | 0.01                           |
| Erysipelatoclostridium_Erysipelatoclostridium_amosum | -0.097                   | 6.23E-03 | 5.27E-02 | 0.212                        | 1.72E-07 | 1.27E-06 | 0.09                           |
| Faecalicatena_Faecalicatena_contorta                 | -0.523                   | 1.80E-06 | 9.75E-05 | 0.037                        | 4.18E-03 | 1.19E-02 | 0.04                           |
| Faecalicatena_Faecalicatena_fissicatena              | -0.316                   | 4.81E-04 | 7.97E-03 | 0.069                        | 1.10E-05 | 5.56E-05 | 0.00                           |
| Holdemanella_Holdemanella_biformis                   | 0.130                    | 1.05E-02 | 6.93E-02 | -0.148                       | 1.48E-07 | 1.13E-06 | 0.17                           |
| Holdemanella_Holdemanella_massiliensis               | -0.186                   | 8.41E-04 | 1.19E-02 | -0.067                       | 8.80E-03 | 2.25E-02 | 0.02                           |
| Hungatella_Hungatella_hathewayi                      | -0.303                   | 1.94E-05 | 6.80E-04 | 0.121                        | 1.55E-09 | 1.57E-08 | 0.13                           |
| Intestinimonas_Intestinimonas_butyliciproducens      | -0.386                   | 1.72E-09 | 5.13E-07 | -0.113                       | 3.94E-07 | 2.70E-06 | 0.10                           |
| Intestinimonas_Intestinimonas_massiliensis           | -0.326                   | 4.96E-07 | 4.38E-05 | -0.086                       | 9.20E-05 | 3.92E-04 | 0.07                           |
| Megasphaera_Megasphaera_cerevisiae                   | 0.091                    | 2.56E-01 | 4.88E-01 | -0.032                       | 7.09E-02 | 1.37E-01 | 0.00                           |
| Megasphaera_Megasphaera_elsdenii                     | 0.122                    | 2.93E-03 | 3.07E-02 | -0.030                       | 3.93E-01 | 5.27E-01 | 0.04                           |
| Megasphaera_Megasphaera_massiliensis                 | 0.141                    | 4.71E-03 | 4.32E-02 | 0.216                        | 3.66E-14 | 8.39E-13 | 0.03                           |
| Megasphaera_Megasphaera_micronuciformis              | 0.236                    | 9.13E-03 | 6.53E-02 | 0.004                        | 7.93E-01 | 8.60E-01 | 0.00                           |
| Megasphaera_Megasphaera_sp._BV3C161                  | 0.093                    | 5.35E-01 | 7.30E-01 | 0.012                        | 2.08E-01 | 3.27E-01 | 0.00                           |
| Megasphaera_Megasphaera_sp._UPII_135E                | -0.281                   | 1.15E-02 | 7.40E-02 | -0.067                       | 1.53E-07 | 1.15E-06 | 0.00                           |
| Methanobrevibacter_Methanobrevibacter_oralis         | -0.113                   | 8.27E-01 | 9.09E-01 | -0.001                       | 6.10E-01 | 7.21E-01 | 0.00                           |
| Methanobrevibacter_Methanobrevibacter_smithii        | -0.106                   | 7.35E-04 | 1.10E-02 | -0.121                       | 7.88E-03 | 2.03E-02 | 0.08                           |
| Parasutterella_Parasutterella_excrementihominis      | 0.064                    | 2.45E-02 | 1.23E-01 | 0.119                        | 1.84E-02 | 4.34E-02 | 0.21                           |
| Prevotella_Prevotella_albensis                       | 0.123                    | 5.45E-03 | 4.85E-02 | -0.317                       | 3.59E-23 | 7.13E-21 | 0.01                           |
| Prevotella_Prevotella_amnii                          | -0.040                   | 5.80E-01 | 7.52E-01 | -0.068                       | 5.75E-04 | 2.09E-03 | 0.00                           |
| Prevotella_Prevotella_aurantiaca                     | -0.182                   | 1.45E-01 | 3.47E-01 | -0.031                       | 7.02E-03 | 1.87E-02 | 0.00                           |
| Prevotella_Prevotella_baroniae                       | 0.140                    | 3.69E-01 | 5.92E-01 | 0.006                        | 5.25E-01 | 6.50E-01 | 0.00                           |
| Prevotella_Prevotella_bergensis                      | 0.102                    | 1.52E-02 | 8.88E-02 | -0.265                       | 6.77E-15 | 1.75E-13 | 0.02                           |
| Prevotella_Prevotella_bivia                          | 0.061                    | 9.90E-02 | 2.77E-01 | -0.369                       | 5.97E-22 | 5.93E-20 | 0.09                           |
| Prevotella_Prevotella_bryantii                       | 0.086                    | 1.91E-02 | 1.06E-01 | -0.389                       | 9.65E-24 | 2.88E-21 | 0.02                           |

|                                                  |        |          |          |        |          |          |       |
|--------------------------------------------------|--------|----------|----------|--------|----------|----------|-------|
| Prevotella_Prevotella_buccae                     | 0.086  | 4.34E-01 | 6.47E-01 | -0.033 | 1.01E-02 | 2.53E-02 | 0.01  |
| Prevotella_Prevotella_buccalis                   | 0.019  | 7.17E-01 | 8.30E-01 | -0.045 | 9.81E-02 | 1.78E-01 | 0.03  |
| Prevotella_Prevotella_copri                      | 0.069  | 1.66E-03 | 2.02E-02 | -0.532 | 3.13E-16 | 1.04E-14 | 10.99 |
| Prevotella_Prevotella_corporis                   | 0.131  | 2.86E-03 | 3.04E-02 | -0.099 | 2.48E-03 | 7.69E-03 | 0.01  |
| Prevotella_Prevotella_dentalis                   | 0.082  | 1.78E-01 | 3.98E-01 | -0.116 | 7.21E-07 | 4.67E-06 | 0.00  |
| Prevotella_Prevotella_dentasinii                 | -0.243 | 4.63E-02 | 1.83E-01 | -0.061 | 1.80E-07 | 1.31E-06 | 0.00  |
| Prevotella_Prevotella_denticola                  | 0.080  | 5.62E-01 | 7.46E-01 | -0.043 | 3.04E-05 | 1.43E-04 | 0.00  |
| Prevotella_Prevotella_disiens                    | -0.017 | 6.93E-01 | 8.20E-01 | -0.229 | 1.56E-11 | 2.27E-10 | 0.02  |
| Prevotella_Prevotella_enoeca                     | 0.366  | 1.33E-02 | 8.00E-02 | -0.042 | 1.21E-05 | 6.06E-05 | 0.00  |
| Prevotella_Prevotella_fusca                      | 0.216  | 2.03E-02 | 1.07E-01 | -0.079 | 2.43E-07 | 1.72E-06 | 0.00  |
| Prevotella_Prevotella_histicola                  | 0.191  | 4.14E-02 | 1.75E-01 | -0.072 | 2.49E-06 | 1.41E-05 | 0.00  |
| Prevotella_Prevotella_intermedia                 | -0.169 | 2.95E-01 | 5.28E-01 | -0.020 | 2.54E-02 | 5.71E-02 | 0.00  |
| Prevotella_Prevotella_maculosa                   | -0.140 | 3.00E-01 | 5.28E-01 | -0.016 | 1.30E-01 | 2.21E-01 | 0.00  |
| Prevotella_Prevotella_marshii                    | 0.146  | 1.07E-01 | 2.87E-01 | -0.049 | 1.94E-03 | 6.14E-03 | 0.00  |
| Prevotella_Prevotella_melaninogenica             | 0.084  | 3.13E-01 | 5.39E-01 | -0.100 | 7.01E-09 | 6.74E-08 | 0.00  |
| Prevotella_Prevotella_micans                     | 0.334  | 1.15E-01 | 3.01E-01 | -0.020 | 3.63E-03 | 1.05E-02 | 0.00  |
| Prevotella_Prevotella_multiformis                | 0.177  | 8.51E-03 | 6.34E-02 | -0.149 | 1.86E-12 | 3.08E-11 | 0.00  |
| Prevotella_Prevotella_multisaccharivorax         | 0.201  | 1.18E-03 | 1.56E-02 | -0.208 | 1.15E-19 | 7.62E-18 | 0.00  |
| Prevotella_Prevotella_nanceiensis                | 0.095  | 3.98E-02 | 1.72E-01 | 0.217  | 2.05E-12 | 3.30E-11 | 0.01  |
| Prevotella_Prevotella_nigrescens                 | -0.013 | 9.45E-01 | 9.74E-01 | 0.002  | 8.20E-01 | 8.79E-01 | 0.00  |
| Prevotella_Prevotella_oris                       | 0.073  | 7.20E-01 | 8.30E-01 | -0.008 | 2.44E-01 | 3.71E-01 | 0.00  |
| Prevotella_Prevotella_oryzae                     | 0.335  | 5.32E-02 | 1.98E-01 | -0.047 | 1.11E-08 | 1.02E-07 | 0.00  |
| Prevotella_Prevotella_oulorum                    | 0.080  | 1.80E-01 | 4.01E-01 | -0.170 | 1.46E-12 | 2.49E-11 | 0.00  |
| Prevotella_Prevotella_pallens                    | -0.010 | 8.45E-01 | 9.12E-01 | -0.133 | 1.57E-06 | 9.65E-06 | 0.01  |
| Prevotella_Prevotella_saccharolytica             | 0.085  | 6.51E-01 | 7.93E-01 | -0.020 | 9.28E-03 | 2.34E-02 | 0.00  |
| Prevotella_Prevotella_salivae                    | 0.088  | 4.16E-01 | 6.34E-01 | -0.096 | 4.31E-13 | 7.78E-12 | 0.00  |
| Prevotella_Prevotella_scopos                     | 0.141  | 1.84E-01 | 4.07E-01 | -0.075 | 2.98E-08 | 2.54E-07 | 0.00  |
| Prevotella_Prevotella_sp._109                    | 0.126  | 6.56E-02 | 2.18E-01 | -0.012 | 5.69E-01 | 6.88E-01 | 0.18  |
| Prevotella_Prevotella_sp._AGR2160                | 0.173  | 9.72E-03 | 6.72E-02 | -0.106 | 6.86E-07 | 4.49E-06 | 0.00  |
| Prevotella_Prevotella_sp._HUN102                 | -0.072 | 2.98E-01 | 5.28E-01 | -0.074 | 3.70E-04 | 1.43E-03 | 0.00  |
| Prevotella_Prevotella_sp._P476                   | 0.052  | 1.58E-01 | 3.72E-01 | -0.312 | 1.23E-15 | 3.33E-14 | 0.19  |
| Prevotella_Prevotella_sp._S7_MS_2                | -0.082 | 2.33E-01 | 4.62E-01 | -0.086 | 3.52E-05 | 1.64E-04 | 0.00  |
| Prevotella_Prevotella_sp._S718                   | 0.059  | 1.20E-01 | 3.07E-01 | -0.314 | 9.59E-17 | 3.57E-15 | 0.03  |
| Prevotella_Prevotella_stercorea                  | 0.059  | 6.96E-02 | 2.25E-01 | -0.399 | 5.22E-20 | 3.89E-18 | 0.78  |
| Prevotella_Prevotella_timonensis                 | -0.050 | 3.37E-01 | 5.57E-01 | -0.152 | 3.82E-08 | 3.21E-07 | 0.01  |
| Roseburia_Roseburia_faecis                       | 0.168  | 2.01E-04 | 3.99E-03 | -0.163 | 2.68E-07 | 1.87E-06 | 1.34  |
| Roseburia_Roseburia_hominis                      | 0.078  | 2.55E-01 | 4.88E-01 | -0.070 | 8.52E-04 | 3.00E-03 | 0.39  |
| Roseburia_Roseburia_intestinalis                 | 0.085  | 8.13E-02 | 2.52E-01 | -0.204 | 2.35E-12 | 3.69E-11 | 1.54  |
| Roseburia_Roseburia_inulinivorans                | 0.053  | 3.75E-01 | 5.99E-01 | -0.197 | 1.38E-16 | 4.84E-15 | 1.82  |
| Ruthenibacterium_Ruthenibacterium_lactatiformans | -0.361 | 5.83E-08 | 6.95E-06 | 0.087  | 5.39E-05 | 2.40E-04 | 0.36  |
| Sellimonas_Sellimonas_intestinalis               | -0.184 | 7.45E-05 | 2.02E-03 | 0.144  | 2.96E-06 | 1.65E-05 | 0.03  |
| Senegalimassilia_Senegalimassilia_anaerobia      | 0.083  | 5.03E-02 | 1.92E-01 | -0.248 | 1.81E-13 | 3.60E-12 | 0.03  |
| Veillonella_Veillonella_magna                    | 0.225  | 3.24E-01 | 5.44E-01 | -0.001 | 8.70E-01 | 9.15E-01 | 0.00  |
| Veillonella_Veillonella_parvula                  | 0.070  | 2.54E-03 | 8.29E-02 | -0.168 | 1.86E-06 | 1.11E-05 | 0.04  |
| Veillonella_Veillonella_semanalis                | 0.042  | 6.05E-01 | 7.62E-01 | -0.036 | 3.72E-02 | 7.98E-02 | 0.01  |

These associations were estimated after adjustment for demographic, socioeconomic, behavioral and clinical factors. FDR *P-values* were calculated based on all the 596 species belong to 84 genera included in the current analysis.

**Table S11. Conditional analysis for genera associated with both obesity and US exposure.**

| Taxa_Genus             | Conditional Analysis |       | Conditional Analysis |       | Conditional Analysis |       | Conditional Analysis |       | Expected | Cluster  |
|------------------------|----------------------|-------|----------------------|-------|----------------------|-------|----------------------|-------|----------|----------|
|                        | Obesity Model1       |       | US exposure Model1   |       | Obesity Model2       |       | US exposure Model2   |       |          |          |
|                        | Beta                 | P     | Beta                 | P     | Beta                 | P     | Beta                 | P     |          |          |
| Acidaminococcus        | 0.014                | 0.004 | 0.046                | 0.000 | NA                   |       | NA                   |       | Y        | -        |
| Megasphaera            | 0.004                | 0.514 | 0.016                | 0.133 | NA                   |       | NA                   |       | Y        | -        |
| Parasutterella         | 0.015                | 0.002 | 0.020                | 0.009 | NA                   |       | NA                   |       | Y        | -        |
| Methanobrevibacter     | -0.019               | 0.005 | 0.011                | 0.285 | NA                   |       | NA                   |       | Y        | -        |
| Holdemania             | -0.020               | 0.044 | -0.035               | 0.028 | NA                   |       | NA                   |       | Y        | -        |
| Intestinimonas         | -0.063               | 0.000 | -0.145               | 0.000 | NA                   |       | NA                   |       | Y        | -        |
| Dorea                  | 0.041                | 0.004 | 0.018                | 0.438 | NA                   |       | 0.009                | 0.696 | Y        | ClusterA |
| Holdemanella           | 0.007                | 0.474 | 0.017                | 0.279 | 0.064                | 0.262 | 0.016                | 0.307 | Y        | ClusterA |
| Roseburia              | 0.005                | 0.667 | -0.063               | 0.002 | 0.076                | 0.268 | NA                   |       | Y        | ClusterA |
| Coprococcus            | 0.027                | 0.032 | -0.031               | 0.124 | NA                   |       | -0.026               | 0.174 | Y        | ClusterA |
| Prevotella             | -0.003               | 0.690 | -0.031               | 0.003 | 0.029                | 0.422 | NA                   |       | Y        | ClusterA |
| Catenibacterium        | 0.008                | 0.143 | -0.002               | 0.785 | 0.034                | 0.246 | 0.001                | 0.867 | Y        | ClusterA |
| Senegalimassilia       | -0.005               | 0.551 | -0.048               | 0.001 | -0.031               | 0.545 | NA                   |       | Y        | ClusterA |
| Veillonella            | -0.003               | 0.704 | -0.021               | 0.086 | 0.058                | 0.164 | -0.010               | 0.415 | Y        | ClusterA |
| Anaerotruncus          | -0.013               | 0.424 | 0.182                | 0.000 | -0.089               | 0.290 | NA                   |       | Y        | ClusterB |
| Eggerthella            | -0.018               | 0.046 | -0.024               | 0.108 | NA                   |       | -0.021               | 0.141 | Y        | ClusterB |
| Faecalicatena          | -0.050               | 0.014 | 0.017                | 0.214 | NA                   |       | 0.027                | 0.406 | Y        | ClusterB |
| Sellimonas             | -0.010               | 0.272 | 0.022                | 0.114 | -0.050               | 0.320 | 0.023                | 0.088 | Y        | ClusterB |
| Hungatella             | 0.015                | 0.304 | 0.033                | 0.158 | -0.054               | 0.489 | 0.020                | 0.400 | Y        | ClusterB |
| Erysipelatoclostridium | 0.005                | 0.680 | 0.054                | 0.008 | 0.057                | 0.413 | NA                   |       | Y        | ClusterB |
| Ruthenibacterium       | 0.009                | 0.558 | -0.024               | 0.329 | -0.092               | 0.230 | 0.026                | 0.274 | Y        | ClusterB |
| Eisenbergiella         | -0.019               | 0.064 | 0.040                | 0.007 | -0.053               | 0.232 | NA                   |       | Y        | ClusterB |

The conditional analysis Model 1 included 22 genera associated with both obesity and US exposure (*Cellulomonas* was excluded due to its high correlation with *Prevotella* and its low relative abundance) in addition to demographic, socioeconomic, behavioral and clinical covariates.

The conditional analysis Model 2 for obesity included four independent BMI-associated genera (*Dorea*, *Coprococcus*, *Eggerthella*, *Faecalicatena*), in addition to demographic, socioeconomic, behavioral and clinical covariates.

The conditional analysis Model 2 for US exposure included six independent US exposure-associated genera (*Anaerotruncus*, *Eisenbergiella*, *Erysipelatoclostridium*, *Roseburia*, *Prevotella*, *Senegalimassilia*), in addition to demographic, socioeconomic, behavioral and clinical covariates.

**Table S12. Levels of gut microbial genera according to host obesity.**

|                           | normal |      | overweight |      | obese I |      | obese II |      | obese III |      | <i>P</i> trend |
|---------------------------|--------|------|------------|------|---------|------|----------|------|-----------|------|----------------|
|                           | lsmean | SE   | lsmean     | SE   | lsmean  | SE   | lsmean   | SE   | lsmean    | SE   |                |
| <b>Dorea</b>              | 9.88   | 0.07 | 10.05      | 0.05 | 10.13   | 0.06 | 10.08    | 0.08 | 10.20     | 0.10 | 0.004          |
| <b>Coprococcus</b>        | 7.23   | 0.85 | 7.39       | 0.85 | 7.39    | 0.85 | 7.42     | 0.85 | 7.58      | 0.85 | 0.018          |
| Roseburia                 | 12.30  | 0.08 | 12.50      | 0.06 | 12.40   | 0.07 | 12.40    | 0.09 | 12.40     | 0.12 | 0.722          |
| Prevotella                | 11.70  | 0.15 | 11.70      | 0.11 | 11.50   | 0.13 | 11.80    | 0.19 | 11.60     | 0.23 | 0.552          |
| <b>Intestinimonas</b>     | 7.06   | 0.06 | 7.05       | 0.05 | 6.99    | 0.05 | 6.87     | 0.08 | 6.66      | 0.10 | <0.001         |
| <b>Holdemania</b>         | 4.03   | 0.10 | 3.86       | 0.07 | 3.89    | 0.08 | 3.95     | 0.12 | 3.55      | 0.15 | 0.049          |
| Senegalimassilia          | 3.89   | 0.11 | 3.72       | 0.08 | 3.73    | 0.09 | 3.79     | 0.13 | 3.57      | 0.17 | 0.244          |
| Eisenbergiella            | 4.57   | 0.10 | 4.39       | 0.08 | 4.40    | 0.09 | 4.41     | 0.13 | 4.31      | 0.16 | 0.188          |
| <b>Eggerthella</b>        | 5.59   | 0.11 | 5.47       | 0.08 | 5.40    | 0.09 | 5.43     | 0.13 | 5.11      | 0.16 | 0.020          |
| Erysipelatoclostridium    | 6.88   | 0.08 | 6.87       | 0.06 | 6.87    | 0.06 | 6.88     | 0.09 | 6.87      | 0.12 | 0.953          |
| Faecalicatena             | 5.82   | 0.05 | 5.72       | 0.03 | 5.69    | 0.04 | 5.76     | 0.06 | 5.62      | 0.07 | 0.027          |
| <b>Anaerotruncus</b>      | 6.86   | 0.06 | 6.82       | 0.05 | 6.82    | 0.05 | 6.77     | 0.08 | 6.80      | 0.09 | 0.401          |
| <b>Acidaminococcus</b>    | 3.93   | 0.19 | 3.87       | 0.14 | 4.09    | 0.16 | 4.29     | 0.24 | 4.84      | 0.30 | 0.003          |
| <b>Parasutterella</b>     | 4.19   | 0.20 | 4.39       | 0.15 | 4.69    | 0.17 | 4.42     | 0.24 | 5.35      | 0.31 | 0.003          |
| <b>Methanobrevibacter</b> | 2.69   | 0.15 | 2.78       | 0.11 | 2.38    | 0.13 | 2.50     | 0.18 | 2.19      | 0.23 | 0.006          |

Data are adjusted mean (SE) of each gut microbial genus (CSS transformed relative abundance) across host obesity status after adjustment for demographic, socioeconomic, behavioral and clinical covariates, and other genera (mutual adjustment, conditional analysis). Bold font indicates the microbial genera significantly associated with host obesity status (*P*trend < 0.05).

**Table S13. Target US exposure associated enzyme selection: Enrichment test for the annotated enzymes**

| Enzyme LV2                                                       | Sig_Enzymes<br>at ELV2<br>(FDR0.1) | not_sig | Total Enzymes<br>of the category<br>(>=10) | P      |
|------------------------------------------------------------------|------------------------------------|---------|--------------------------------------------|--------|
| 3.2 Glycosylases                                                 | 21                                 | 52      | 73                                         | 0.001* |
| 2.5 Transferring alkyl or aryl groups, other than methyl groups  | 12                                 | 27      | 39                                         | 0.006  |
| 2.3 Acyltransferases                                             | 15                                 | 65      | 80                                         | 0.151  |
| 3.5 Acting on carbon-nitrogen bonds, other than peptide bonds    | 14                                 | 63      | 77                                         | 0.190  |
| 3.6 Acting on acid anhydrides                                    | 17                                 | 80      | 97                                         | 0.201  |
| 2.1 Transferring one-carbon groups                               | 17                                 | 83      | 100                                        | 0.238  |
| 2.4 Glycosyltransferases                                         | 16                                 | 83      | 99                                         | 0.314  |
| 5.4 Intramolecular transferases                                  | 7                                  | 33      | 40                                         | 0.327  |
| 1.6 Acting on NADH or NADPH                                      | 5                                  | 24      | 29                                         | 0.385  |
| 3.4 Acting on peptide bonds (peptidases)                         | 10                                 | 53      | 63                                         | 0.390  |
| 4.2 Carbon-oxygen lyases                                         | 12                                 | 66      | 78                                         | 0.414  |
| 6.1 Forming carbon-oxygen bonds                                  | 5                                  | 25      | 30                                         | 0.415  |
| 1.8 Acting on a sulfur group of donors                           | 3                                  | 17      | 20                                         | 0.546  |
| 4.1 Carbon-carbon lyases                                         | 12                                 | 74      | 86                                         | 0.553  |
| 1.3 Acting on the CH-CH group of donors                          | 5                                  | 30      | 35                                         | 0.555  |
| 4.3 Carbon-nitrogen lyases                                       | 2                                  | 11      | 13                                         | 0.562  |
| 5.1 Racemases and epimerases                                     | 3                                  | 20      | 23                                         | 0.643  |
| 3.1 Acting on ester bonds                                        | 14                                 | 94      | 108                                        | 0.661  |
| 2.6 Transferring nitrogenous groups                              | 5                                  | 36      | 41                                         | 0.697  |
| 6.3 Forming carbon-nitrogen bonds                                | 6                                  | 43      | 49                                         | 0.699  |
| 1.17 Acting on CH or CH2 groups                                  | 1                                  | 9       | 10                                         | 0.779  |
| 2.7 Transferring phosphorus-containing groups                    | 35                                 | 247     | 282                                        | 0.789  |
| 1.4 Acting on the CH-NH2 group of donors                         | 2                                  | 19      | 21                                         | 0.813  |
| 2.8 Transferring sulfur-containing groups                        | 2                                  | 19      | 21                                         | 0.813  |
| 1.5 Acting on the CH-NH group of donors                          | 1                                  | 13      | 14                                         | 0.879  |
| 5.2 cis-trans-Isomerases                                         | 1                                  | 13      | 14                                         | 0.879  |
| 1.1 Acting on the CH-OH group of donors                          | 11                                 | 102     | 113                                        | 0.927  |
| 1.2 Acting on the aldehyde or oxo group of donors                | 4                                  | 49      | 53                                         | 0.949  |
| 1.- other                                                        | 1                                  | 23      | 24                                         | 0.973  |
| 1.14 Acting on paired donors, with O2 as oxidant and incorporati | 1                                  | 24      | 25                                         | 0.977  |

\*: FDR  $P < 0.05$



**Table S14. Regression analyses: Enrichment test selected key enzymes associated with both US exposure and fiber intake.**

| KO group | Association with US exposure |          |       | Association with Diet Fiber |          |       | Expected | Enzyme Annotations LV4                          | Enzyme Annotations LV3                                                      | Enzyme AnnotationsLV2 | Enzyme Annotations LV1 |
|----------|------------------------------|----------|-------|-----------------------------|----------|-------|----------|-------------------------------------------------|-----------------------------------------------------------------------------|-----------------------|------------------------|
|          | Beta                         | P        | P.FDR | Beta                        | P        | P.FDR |          |                                                 |                                                                             |                       |                        |
| K01191   | 4.46E-04                     | 5.56E-03 | 0.064 | -2.07E-04                   | 3.69E-06 | 0.000 | Y        | 3.2.1.24 alpha-mannosidase                      | 3.2.1 Glycosidases, i.e. enzymes that hydrolyse O- and S-glycosyl compounds | 3.2 Glycosylases      | 3. Hydrolases          |
| K01250   | 4.55E-04                     | 4.56E-03 | 0.061 | -2.09E-04                   | 3.11E-06 | 0.000 | Y        | 3.2.-.-                                         | 3.2.- Glycosylases                                                          | 3.2 Glycosylases      | 3. Hydrolases          |
| K10563   | 4.94E-04                     | 7.43E-03 | 0.072 | -2.43E-04                   | 2.31E-06 | 0.000 | Y        | 3.2.2.23 DNA-formamidopyrimidine glycosylase    | 3.2.2 Hydrolysing N-glycosyl compounds                                      | 3.2 Glycosylases      | 3. Hydrolases          |
| K01209   | -1.44E-03                    | 8.63E-03 | 0.076 | 6.04E-04                    | 7.75E-05 | 0.003 | Y        | 3.2.1.55 alpha-N-arabinofuranosidase            | 3.2.1 Glycosidases, i.e. enzymes that hydrolyse O- and S-glycosyl compounds | 3.2 Glycosylases      | 3. Hydrolases          |
| K01206   | 1.71E-03                     | 1.78E-03 | 0.041 | -5.81E-04                   | 1.38E-04 | 0.004 | Y        | 3.2.1.51 alpha-L-fucosidase                     | 3.2.1 Glycosidases, i.e. enzymes that hydrolyse O- and S-glycosyl compounds | 3.2 Glycosylases      | 3. Hydrolases          |
| K01243   | -6.27E-04                    | 8.36E-03 | 0.074 | 2.28E-04                    | 5.84E-04 | 0.011 | Y        | 3.2.2.9 adenosylhomocysteine nucleosidase       | 3.2.2 Hydrolysing N-glycosyl compounds                                      | 3.2 Glycosylases      | 3. Hydrolases          |
| K01200   | 1.28E-03                     | 6.19E-03 | 0.067 | -4.41E-04                   | 6.55E-04 | 0.013 | Y        | 3.2.1.41 pullulanase                            | 3.2.1 Glycosidases, i.e. enzymes that hydrolyse O- and S-glycosyl compounds | 3.2 Glycosylases      | 3. Hydrolases          |
| K01223   | -8.94E-04                    | 3.38E-03 | 0.056 | 2.57E-04                    | 2.47E-03 | 0.029 | Y        | 3.2.1.86 6-phospho-beta-glucosidase             | 3.2.1 Glycosidases, i.e. enzymes that hydrolyse O- and S-glycosyl compounds | 3.2 Glycosylases      | 3. Hydrolases          |
| K01208   | -1.62E-03                    | 7.53E-03 | 0.072 | 5.00E-04                    | 3.02E-03 | 0.033 | Y        | 3.2.1.54 cyclomaltodextrinase                   | 3.2.1 Glycosidases, i.e. enzymes that hydrolyse O- and S-glycosyl compounds | 3.2 Glycosylases      | 3. Hydrolases          |
| K12373   | 4.15E-03                     | 1.32E-02 | 0.096 | -1.36E-03                   | 3.46E-03 | 0.037 | Y        | 3.2.1.52 beta-N-acetylhexosaminidase            | 3.2.1 Glycosidases, i.e. enzymes that hydrolyse O- and S-glycosyl compounds | 3.2 Glycosylases      | 3. Hydrolases          |
| K15531   | -7.93E-04                    | 9.77E-03 | 0.083 | 2.47E-04                    | 3.93E-03 | 0.040 | Y        | 3.2.1.156 oligosaccharide reducing-end xylanase | 3.2.1 Glycosidases, i.e. enzymes that hydrolyse O- and S-glycosyl compounds | 3.2 Glycosylases      | 3. Hydrolases          |
| K01214   | -1.82E-03                    | 2.97E-03 | 0.053 | 4.81E-04                    | 4.85E-03 | 0.047 | Y        | 3.2.1.68 isoamylase                             | 3.2.1 Glycosidases, i.e. enzymes that hydrolyse O- and S-glycosyl compounds | 3.2 Glycosylases      | 3. Hydrolases          |

These associations were estimated after adjustment for demographic, socioeconomic, behavioral and clinical factors.

**Table S15. The presence of key enzymes in specific bacteria: Alignment analysis**

| Enzyme (ID)  | Enzyme Annotation                     | Enzyme Representative Reference Sequences | Enzyme Representative KO group | Bacteria Cluster | Genus              | NCBI Reference genomes of the Genus     | Presence | Max Score                        | Total Score | Query Coverage | E value | Percent identity |  |  |
|--------------|---------------------------------------|-------------------------------------------|--------------------------------|------------------|--------------------|-----------------------------------------|----------|----------------------------------|-------------|----------------|---------|------------------|--|--|
|              |                                       |                                           |                                |                  |                    |                                         |          |                                  |             |                |         |                  |  |  |
| EC:3.2.1.156 | oligosaccharide reducing-end xylanase | rexA                                      | K11531                         | Cluster A        | <i>Prevotella</i>  | <i>Prevotella ruminicola ATCC 19189</i> | Y        | 2449                             | 2449        | 100%           | 0       | 100.00%          |  |  |
|              |                                       |                                           |                                | Cluster A        |                    | <i>prevotella copri DSM 18205</i>       | Y        | 34.6                             | 13687       | 97%            | 0.078   | 95.24%           |  |  |
|              |                                       |                                           |                                | Cluster A        | <i>Roseburia</i>   | <i>Roseburia hominis DSM:16839</i>      | Y        | 2111                             | 2111        | 100%           | 0       | 100.00%          |  |  |
|              |                                       |                                           |                                | Cluster A        |                    | <i>Roseburia intestinalis XB6B4</i>     | Y        | 2128                             | 2128        | 100%           | 0       | 100.00%          |  |  |
|              |                                       |                                           |                                | Cluster A        | <i>Dorea</i>       | <i>Dorea formicigenerans ATCC 27755</i> | N        | No significant similarity found. |             |                |         |                  |  |  |
|              |                                       |                                           |                                | Cluster A        | <i>Coprococcus</i> | <i>Coprococcus comes ATCC 27758</i>     | N        | No significant similarity found. |             |                |         |                  |  |  |
